# Supplementary material for: A biocompatible pea protein isolate-derived bioink for 3D bioprinting and tissue engineering
Source: Royal Society of Chemistry journal article supplement (doi:10.1039/d4tb00781f), 2024-01-01
Supplement: d4tb00781f1.pdf [file d4tb00781f1.pdf]

## A biocompatible pea isolate protein-derived bioink for 3D bioprinting and tissue engineering

Xin Chen,<sup>a</sup> Zheng Zhou,<sup>\*b</sup> Mengni Yang,<sup>a</sup> Shuai Zhu,<sup>a</sup> Wenxiang Zhu,<sup>a</sup> Jingjing Sun,<sup>b</sup> Mengyi Yu,<sup>a</sup> Jiaqian He,<sup>b</sup> You Zuo,<sup>b</sup> Wenxin Wang,<sup>c</sup> Ning He,<sup>c</sup> Xiaoxiao Han<sup>c</sup> and Hairong Liu<sup>\*a</sup>

<sup>a</sup> College of Material Science and Engineering, Hunan University, Changsha 410082, China;

<sup>b</sup> College of Biology, Hunan University, Changsha 410082, China;

<sup>c</sup> College of Mechanical and Vehicle Engineering, Hunan University, Changsha 410082, China;

\* Correspondence: liuhairong@hnu.edu.cn (Hairong Liu), zhouzheng@hnu.edu.cn (Zheng Zhou)

## Supplementary information

**Table S1.** The sequences of primers used for RT-qPCR.

| The full name of each RNA         | Abbreviation  | 5'-3'   | Primer Sequences       |
|-----------------------------------|---------------|---------|------------------------|
| <i>Glyceraldehyde-3-phosphate</i> | <i>GAPDH</i>  | Forward | TTGTCGCCATCAATGATCCAT  |
|                                   |               | Reverse | GATGACCAGCTTCCC GTTCTC |
| <i>Type I Collagen</i>            | <i>COL I</i>  | Forward | CTAGCCACCTGCCAGTCTTTA  |
|                                   |               | Reverse | GGACCATCATCACCATCTCTG  |
| <i>Type II Collagen</i>           | <i>COL II</i> | Forward | GAGAGCCTGGGACCCCTGGAA  |
|                                   |               | Reverse | CGCCTCCAGCCTTCTCGTCAA  |
| <i>Aggrecan</i>                   | <i>AGG</i>    | Forward | GCTGCTACGGAGACAAGGATG  |
|                                   |               | Reverse | CGTTGCGTAAAAGACCTCACC  |
| <i>SRY-related HMG box 9</i>      | <i>SOX9</i>   | Forward | GCGTCAACGGCTCCAGCAAGA  |
|                                   |               | Reverse | GCGTTGTGCAGGTGCGGGTAC  |

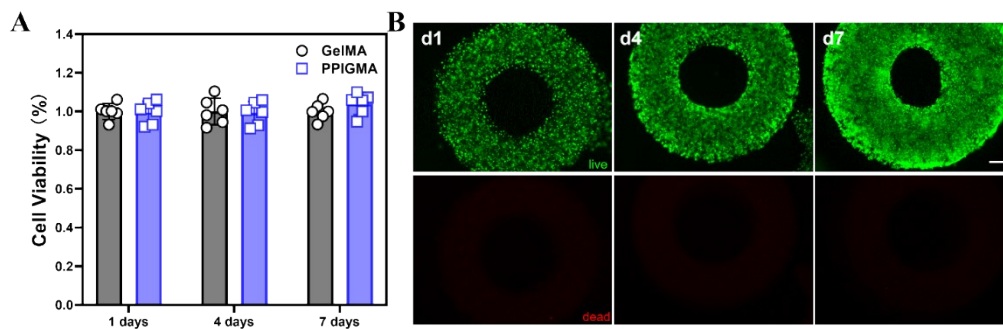

**Figure S1.** Cell viability in the 3D bioprinting. (A) The cell proliferation in 3D bioprinted cell-hydrogel composites was determined by the CCK-8 assay after 1, 4 and 7 d culture. (B) Live and dead assay results of the chondrocyte cells in PPIGMA as bioinks, scale bar is 100 μm.
